1 **Population structure of eulachon *Thaleichthys pacificus* from Northern California to**  
2 **Alaska using single nucleotide polymorphisms from direct amplicon sequencing**

3 Ben J. G. Sutherland<sup>1\*</sup>, John Candy<sup>1</sup>, Kayla Mohns<sup>1</sup>, Olivia Cornies<sup>1</sup>, Kim Jonsen<sup>1</sup>, Khai Le<sup>1</sup>, Richard G.  
4 Gustafson<sup>2</sup>, Krista M. Nichols<sup>2</sup>, Terry D. Beacham<sup>1</sup>

5 <sup>1</sup> Fisheries and Oceans Canada, Pacific Biological Station, 3190 Hammond Bay Road, Nanaimo, BC V9T 6N7,  
6 Canada

7 <sup>2</sup> Conservation Biology Division, Northwest Fisheries Science Center, National Marine Fisheries Service,  
8 National Oceanic and Atmospheric Administration, 2725 Montlake Boulevard East, Seattle, WA 98112, USA

9 \*Author for correspondence: BJGS

10

11

## ABSTRACT

12 Eulachon *Thaleichthys pacificus*, a culturally and ecologically important anadromous smelt (Family Osmeridae),  
13 ranges from Northern California to the southeast Bering Sea. In recent decades, some populations have experienced  
14 declines. Here we use a contig-level genome assembly combined with previously published RADseq-derived  
15 markers to construct an amplicon panel for eulachon. Using this panel, we develop a filtered genetic baseline of 521  
16 variant loci genotyped in 1,989 individuals from 14 populations ranging from Northern California through Central  
17 Alaska. Consistent with prior genetic studies, the strongest separation occurs among three main regions: from  
18 Northern California up to and including the Fraser River; north of the Fraser River to southeast Alaska; and within  
19 the Gulf of Alaska. Separating the Fraser River from southern US populations, and refining additional substructure  
20 within the central coast may be possible in mixed-stock analysis; this will be addressed in future work. The amplicon  
21 panel outperformed the previous microsatellite panel, and thus will be used in future mixed-stock analyses of  
22 eulachon in order to provide new insights for management and conservation of eulachon.

23

24 **Keywords:** Amplicon sequencing; Eulachon; Forage fish; Genotyping; Population Genetics

25

## INTRODUCTION

26 Eulachon *Thaleichthys pacificus* is a culturally and ecologically important anadromous smelt (Family Osmeridae)  
27 distributed in North America from Northern California to the southeast Bering Sea (Hay and McCarter 2000).  
28 Historically, approximately 95 rivers were considered to have spawning populations along the Northwest Pacific  
29 Coast, with large spawning populations in the Columbia River (USA) and the Fraser River (Canada) (COSEWIC  
30 2011; Moody and Pitcher 2010). Eulachon are an important prey species for birds, marine mammals, and fishes, in  
31 part due to a high energetic benefit to cost ratio during foraging (Marston et al. 2002), as well as due to their returning  
32 to spawn at the end of winter and early spring when other prey species are scarce (Moody and Pitcher 2010).  
33 Eulachon are highly important to First Nations and American Indian indigenous peoples for both cultural and  
34 nutritional purposes, for example through the preparation and use of the rendered oil from adult eulachon, commonly  
35 known as “grease” (Moody and Pitcher 2010). Conservation and management of this species are therefore important  
36 goals in both Canada (DFO 2020) and the US (NMFS 2017).

37 Declines in eulachon populations have been reported coastwide since the mid 1990s, although some rivers  
38 maintain healthy returns including rivers in central Alaska (Ormseth 2018) and northern British Columbia (BC)  
39 (Hay and McCarter 2000). Adjacent regions both in southeast Alaska (SEAK) and Canada have declined in recent  
40 years (COSEWIC 2011). Although biomass has increased overall in Alaska eulachon populations, some specific  
41 runs in the area have had large reductions in returns (Flannery et al. 2013; Ormseth et al. 2008). In a meta-analysis  
42 by Moody and Pitcher (2010), factors were identified as associated with declines including bycatch in shrimp and  
43 hake fisheries, seal and sea lion predation, and increasing sea surface temperature. In Canada, no single threat could  
44 be identified for declines in abundance, although “mortality associated with coastwide changes in climate, fishing  
45 (direct and bycatch) and marine predation were considered to be greater threats... than changes in habitat or  
46 predation within spawning rivers” (DFO 2015; Schweigert et al. 2012). Forage fish population fluctuations are also  
47 dependent on environmental conditions, serving as the main link between climatic effects on primary producers and  
48 higher trophic levels (Guénette et al. 2014; Pikitch et al. 2014). In general, these fluctuations in forage fish  
49 populations are considered to be exacerbated by other factors, such as commercial fishing (Essington et al. 2015b),  
50 although the extent of this exacerbation is debated (Essington et al. 2015a; Szuwalski and Hilborn 2015).

51           Within Canada, the Committee on the Status of Endangered Wildlife in Canada (COSEWIC) considers  
52 eulachon to be in three Designatable Units (DUs): the Fraser River; the Central Pacific Coast; and the Nass/Skeena  
53 River (COSEWIC 2011). Both the Fraser River and the Central Pacific Coast DUs were assessed as endangered in  
54 2011 (COSEWIC 2011), whereas the Nass/Skeena DU has been assessed as Special Concern (COSEWIC 2013).  
55 The Fraser River DU and the Central Pacific Coast DU remain under consideration for listing as endangered under  
56 Canada's Species at Risk Act (SARA). Fisheries limitations and bycatch rules in Canada are outlined in Fisheries  
57 Management Plans (e.g., DFO 2020). Within the contiguous US, eulachon are designated as threatened under the  
58 Endangered Species Act within the southern Distinct Population Segment (DPS), ranging from northern California  
59 to the Skeena River, Canada (Gustafson et al. 2012; NMFS 2010). Improved characterization of population structure  
60 and the development of high-throughput methods to genotype unknown origin eulachon will help to better  
61 understand and manage this species, and will be useful in determining causes of declines.

62           In general, marine species with large population sizes are expected to have low population differentiation  
63 due to several factors including low effect of drift and high migration rate (Gagnaire et al. 2015), although this is  
64 not always the case, with molecular genetics now providing new resolution to previously considered homogenous  
65 stocks (Hauser and Carvalho 2008). Eulachon are less differentiated among populations than are other anadromous  
66 species such as salmonids (Candy et al. 2015), but are more differentiated than many marine species (Hauser and  
67 Carvalho 2008; Waples 1998). This may be due to a shorter in-river residence time, rapid downriver transport after  
68 hatch (Beacham et al. 2005; COSEWIC 2011; McLean and Taylor 2001), and thus less opportunity for imprinting,  
69 which may result in lower natal stream fidelity (Hay and McCarter 2000). Prior studies in eulachon using  
70 mitochondrial DNA markers were not able to identify population structure (McLean et al. 1999), but highly  
71 polymorphic microsatellite loci (Kaukinen et al. 2004) provided more resolution to define management units  
72 (Beacham et al. 2005). In Alaska, analyses with these same microsatellite loci identified two large population  
73 groupings, one to the north encompassing Cook Inlet, Prince William Sound, and Yakutat Forelands and one in the  
74 south from populations within the Alexander Archipelago south to Behm Canal (Flannery et al. 2013). This regional  
75 separation follows a hierarchical island model (Slatkin and Voelm 1991) and did not show isolation-by-distance  
76 within each region. The division of the regions and the lack of IBD within region may be in part due to larval  
77 dispersal associated with the counter-clockwise Alaska gyre dispersing larvae from the Yakutat Forelands to the

78 east; the southern populations within the Alexander Archipelago would not experience the same transport.  
79 Restriction-site associated DNA sequencing (RADseq) was applied to eulachon collections from 12 populations  
80 spanning from the Columbia River to the Northern Gulf of Alaska (Candy *et al.* 2015). Although sample sizes for  
81 the RADseq project were smaller than those previously analyzed by microsatellites, this study provided strong  
82 evidence for three genetic clusters (i.e., Northern Gulf of Alaska, Southeast Alaska-BC, and Fraser-Columbia), and  
83 markers identified as putative outliers or having high  $F_{ST}$  were identified to be used for future studies. High  $F_{ST}$   
84 markers can provide increased discrimination power for genetic stock identification (GSI; Ackerman *et al.* 2011;  
85 Hess *et al.* 2011). The combination of highly resolving markers and high sample sizes per population provides the  
86 best power for resolving a species with such low structure. However, such studies would benefit from having multi-  
87 year collections to ensure allele frequencies are stable over time (i.e., multiple brood cycles) and not highly impacted  
88 by sweepstakes reproductive success (Hedgecock and Pudovkin 2011) and annual variation within rivers (Waples  
89 1998).

90         Assigning unknown origin fish by GSI and mixed-stock analysis (MSA) to population or region of origin  
91 is useful for interpreting at-sea ecology during surveys or bycatch interceptions, as little is known as to how eulachon  
92 mix among populations at-sea, or where populations are during different seasons. Knowing where specific DUs  
93 exist and are intercepted as bycatch may help reduce impacts on at-risk populations. Eulachon MSA has been  
94 conducted on eulachon bycatch from fisheries off the west coast of British Columbia since the early 2000s using the  
95 microsatellite panel (Beacham *et al.* 2005). Increased knowledge regarding eulachon at-sea ecology and behaviour,  
96 as well as the ability to identify natal origins of intercepted fish have both been highlighted as priority research needs  
97 in Canada (Schweigert *et al.* 2012), on the US West Coast (NMFS 2017), and in Alaska (Ormseth *et al.* 2008). The  
98 microsatellite panel used for MSA identified that eulachon bycatch from a Chatham Sound (North Coast of BC)  
99 shrimp trawl fishery in 2001 were predominantly of central mainland and Nass River origin, whereas eulachon  
100 caught in a research survey in Queen Charlotte Sound (Central Coast of BC) were from various regions coastwide,  
101 and those caught in a survey along West Coast Vancouver Island were predominantly of Columbia and Fraser origin  
102 (Beacham *et al.* 2005). Tests of samples of spawning eulachon in river mouths (i.e., genetic baseline collections)  
103 within central and southeast Alaska also have demonstrated the potential for assignment within the northern and  
104 southern groupings (Flannery *et al.* 2013). Although ultimately the resolution ability for GSI depends on the level

105 of differentiation that exists within the species, advances in genotyping technology makes it possible to develop an  
106 improved baseline with highly resolving markers, large sample sizes, and multiple sampling years, providing more  
107 accurate estimates for MSA and GSI.

108         Low-density (i.e., ~500 markers) single nucleotide polymorphism (SNP) marker panels genotyped using  
109 high-throughput sequencing of amplicons (also known as GTseq; Campbell et al. 2015) are routinely applied for  
110 GSI and parentage-based tagging (PBT) in order to genotype thousands of individuals at low costs, particularly in  
111 the salmonid fishes. For example, genetic baselines of Coho Salmon *Oncorhynchus kisutch* are currently being used  
112 for MSA in BC fisheries in combination with PBT to assign unknown origin individuals back to genotyped parents  
113 from hatchery broodstock (Beacham et al. 2019). GTseq is a cost-effective solution for questions that do not require  
114 high-density marker panels, but that need to be applied to thousands of individuals (Campbell et al. 2015; Meek and  
115 Larson 2019). Several aspects of SNPs are advantageous compared to microsatellite markers, which include  
116 automation, cost, portability of methods, and scalability (Hauser et al. 2011). Further, due to the fewer number of  
117 alleles per locus compared with microsatellite loci, fewer individuals are needed in order to generate allele  
118 frequencies for baseline samples (Beacham et al. 2011).

119         The present study aimed to develop an approximately 500 marker SNP panel using a contig-level genome  
120 assembly (Sutherland et al. in prep) and the top discriminating markers from the previous coastwide RADseq study  
121 (Candy et al. 2015). The developed SNP panel was applied to tissue archives and new collections to generate a  
122 representative baseline encompassing 1,989 individuals from 14 populations with at least 35 individuals per  
123 population from Northern California to Central Alaska. This baseline allowed us to compare resolution and power  
124 against the microsatellite baseline, to estimate minimum required sample sizes per population, and to evaluate  
125 temporal variation within each river system that contained collections from multiple years. The overarching goal of  
126 the SNP panel and eulachon genetic baseline is to ultimately use the SNP baseline to improve our understanding of  
127 population delimitations and at-sea ecology of eulachon via GSI and MSA.

128

129

## MATERIALS AND METHODS

### 130 *Amplicon panel design*

131 Markers were obtained from a RADseq study of eulachon populations (n = 12 populations) from the Columbia River  
132 (Washington, USA) to the Northern Gulf of Alaska (Candy et al. 2015). These 4,104 RAD loci were each 90 bp in  
133 length and were aligned to the eulachon reference genome (Sutherland et al. in prep) using BLAST (Altschul et al.  
134 1990) with a minimum e-value cutoff of 1e-20. Only the loci that aligned to the reference genome two or fewer  
135 times were retained in order to reduce non-specific hits and markers present in repetitive regions of the genome. The  
136 allowance of two alignments was due to the potential for redundancy in the reference contig assembly, and further  
137 evaluation of each designed marker was conducted after the panel design (e.g., excess heterozygosity). The top hit  
138 as evaluated by bitscore, e-value, and percent identity per locus was used to retain a single representative hit per  
139 locus for downstream analysis.

140 A total of 200 bp in each direction flanking the first SNP in the marker was extracted from the reference  
141 genome using a custom pipeline (see Data Accessibility: *fasta\_SNP\_extract*). If the start or end of a contig was less  
142 than 200 bp from the SNP, then a 400 bp segment was obtained from the start or end of the contig, respectively. The  
143 segment of interest was extracted from the contig using *bedtools* (Quinlan and Hall 2010). The variant locus was  
144 marked with both alleles within the output amplicon fasta file. All putatively adaptive markers from Candy et al.  
145 (2015; n = 193) that passed quality filters were retained for the design (n = 181 putatively adaptive markers).  
146 Putatively neutral markers with the highest overall  $F_{ST}$  were added until a total of 600 markers were present in the  
147 panel (n = 419 neutral markers). The panel was then submitted for design through the AgriSeq panel design pipeline  
148 (Thermo Fisher).

149

### 150 *Sequencing and variant calling*

151 Eulachon samples in the tissue archive at the Molecular Genetics Laboratory (MGL) at Pacific Biological Station  
152 (Fisheries and Oceans Canada) or provided by collaborators (Table 1; see *Acknowledgements*) were amplified using  
153 the designed panel as per manufacturers' instructions (Thermo Fisher).

154 DNA was extracted from tissues using a variety of methods, including chelex extraction, a modified version  
155 of the chelex extraction (i.e. PBT chelex) that includes an additional overnight incubation (with Proteinase-K, chelex

156 beads and UltraPure water) and no high temperature thermal cycling step, the Wizard SV 96 Genomic DNA  
157 Purification System (Promega), DNeasy (QIAGEN), and BioSprint (QIAGEN). Highest genotyping rates were  
158 observed using DNeasy or BioSprint methods, and so when possible, these were used for additional extractions.

159 Individuals were barcoded and amplified using the AgriSeq panel protocol and the eulachon v.1.0 primers  
160 (Additional File S1) as per manufacturers instructions, using the 768 barcodes available (Thermo Fisher), as  
161 previously described (Beacham et al. 2017). Individuals were multiplexed in batches of 768 and sequenced on each  
162 Ion Torrent PI chip (Thermo Fisher). Sequenced samples were de-multiplexed and variants called using a hotspots  
163 file (Additional File S2) in the Torrent Suite software (TS v.5.10.1; *variantCaller* v.5.6.0.4; Thermo Fisher). Called  
164 variants were then imported into the MGL genotype database management system.

165

#### 166 *Data filtering*

167 Data filtering was conducted sequentially, where first, samples were removed due to missing genotypes (i.e., retain  
168 individuals with less than 50% missing data, that is, being genotyped at >259 amplicons). The cutoff of >259  
169 amplicons was chosen as 50% of the total ~518 amplicons that typically made it through quality control filters (note:  
170 this number changed slightly depending on the samples included in the analysis). Second, populations with too few  
171 samples were removed (i.e., retain when population has  $\geq 20$  individuals) for initial evaluation of population  
172 structure. Third, amplicons with excess heterozygosity ( $\geq 0.5$ ), or those missing in too many individuals ( $\geq 50\%$   
173 samples) were removed from the data. Markers were previously screened for deviations from Hardy-Weinberg  
174 equilibrium (Candy et al. 2015). The filtered baseline database was date-stamped and converted to genepop format  
175 for downstream genetic analyses.

176 Locations of baseline populations were plotted on a map in R (R Core Team 2020) using ggplot2 (Wickham  
177 2016) and ggrepel (Slowikowski 2019) based on the GPS coordinates at the river mouth of baseline sites.

178

#### 179 *Population differentiation analysis*

180 The baseline genotypes for all individuals were read into R using adegenet (Jombart 2008) using a custom pipeline  
181 (see Data Accessibility; *simple\_pop\_stats*). Pairwise  $F_{ST}$  (Weir and Cockerham 1984) including 95% confidence  
182 intervals was calculated using *pairwise.WCfst* and *boot.ppfst* for all populations or year-separated populations using



183 hierfstat (Goudet 2005). A neighbour-joining tree using the *edwards.dist* distance metric (Cavalli-Sforza and  
184 Edwards 1967) was generated using the *aboot* function of *poppr* (Kamvar et al. 2014) with 10,000 bootstraps. This  
185 was exported in tree format and input to FigTree v1.4.4 for data visualization (Rambaut 2019). This was conducted  
186 for all populations with at least 20 individuals, then with all populations with at least 35 individuals. It was also  
187 conducted for all populations with at least 35 individuals separated by year.

188 Isolation-by-distance (IBD) was evaluated by finding an approximate distance between all recorded GPS  
189 coordinates for all collection sites using the *distm* function of *geosphere* (Hijmans 2019) and custom scripts (Data  
190 Accessibility; *simple\_pop\_stats*). Pairwise  $F_{ST}$  and pairwise physical distances (km) were compared to calculate a  
191 linear model best fit line to determine adjusted  $R^2$  values of how well the data fit the model. Within-region IBD was  
192 investigated for both northern and southern populations. IBD across regions was investigated using all populations  
193 with at least 20 individuals, then with all populations with at least 35 individuals to estimate the effect of population  
194 sample size on adherence to IBD.

195 To determine the proportion of variance captured within larger groupings observed in the dendrogram,  
196 within populations inside larger groupings (i.e., to determine the amount of variation among collections within a  
197 larger grouping), and the unexplained remaining variation that exists among samples, an Analysis of Molecular  
198 Variance (AMOVA) was calculated using the function *poppr.amova* of *poppr* that uses the *ade4* package (Dray and  
199 Dufour 2007) using default parameters (e.g. removing loci with more than 5% missing data).

200

### 201 *Multivariate statistics*

202 Principal Components Analysis (PCA) was performed by first converting the *genind* to *genlight* using the *gi2gl*  
203 function of *dartR* (Gruber et al. 2018), then conducting a *genlight* PCA by the *glPca* function of *adegenet*, then  
204 plotting with *ggplot2* using 95% confidence to draw ellipses around the samples from each grouping using the  
205 function *stat\_ellipse* (Wickham 2016). Eigenvalues were plotted, three principal components were retained, and  
206 allele loadings for each PC as characterized by *loadingplot* in *adegenet* were plotted to identify top loading markers  
207 into PCs. Further, a Discriminant Analysis of Principal Components (DAPC) was performed using *adegenet*,  
208 retaining 10 PCs and one axis, and variance contributions were plotted. Top loading markers in the DAPC were  
209 characterized.



210

### 211 *Relatedness*

212 Inter-individual relatedness within a population was calculated for all populations to compare relative relatedness  
213 values. A genlight object was created using dartR, then converted to Demerelate format (Kraemer and Gerlach 2017)  
214 in order to format using the ‘readgenotypedata’ function of related (Pew et al. 2015). Subsequently, the coancestry  
215 was calculated within related, implementing *coancestry* (Wang 2011) using the *ritland* (Ritland 1996) and *wang*  
216 (Wang 2002) metrics. Relatedness for these metrics was plotted in R for relatedness within a population.

217

### 218 *Microsatellite Data*

219 Microsatellite data were obtained to compare with the baseline data genotyped by the SNP panel. Existing  
220 microsatellite data were obtained from the baseline collection database at MGL (Beacham et al. 2005) using  
221 Microsatellite Manager v.10.3 (Candy et al. 2002). The newly added population from California (Klamath River)  
222 was genotyped using the same genotyping methods as previously described (Beacham et al. 2005).  $F_{ST}$ , IBD, and  
223 dendrograms were all calculated as described above.

224

225

## RESULTS

### 226 *Amplicon panel design*

227 Of the total 4,104 single SNPs in RAD-tags from Candy et al. (2015), 3,957 (96%) were found to have at least one  
228 significant alignment against the eulachon reference genome (Sutherland et al. in prep). From these markers, 3,880  
229 aligned with a single significant hit, 48 with two hits, and 29 with more than two hits. RAD loci with two or fewer  
230 hits were retained for further development ( $n = 3,928$  RAD loci). These markers were further reduced to a total of  
231 600 SNPs by preferentially selecting the putatively adaptive loci that passed alignment filters ( $n = 181$  of 193) and  
232 high  $F_{ST}$  ( $n = 419$ ) SNPs from Candy et al. (2015). Of these, six putative adaptive and 14 neutral SNPs submitted  
233 did not pass primer design, leaving a total of 580 pairs designed into the eulachon AgriSeq panel (v1.0; Thermo  
234 Fisher). This panel is comprised of primers optimized for Ion Torrent Proton technology, and has not been tested  
235 with other technology. Primer sequences are available in Additional File S1.

236

237 *Baseline population genotyping and quality control*

238 Four sequencing chips (PI v3; Ion Torrent) were used for direct amplicon sequencing of baseline populations of up  
239 to 768 individuals per chip. Sequencing generated a total of 83.9 M, 58.5 M, 79.7 M, and 48.9 M reads within  
240 amplicons per chip for baseline samples, with an average number of reads per sample of 123 k (median = 102 k;  
241 standard deviation = 112 k), 77 k (med = 33 k; sd = 121 k), 105 k (med = 73 k; sd = 114 k), and 87 k (med = 65 k;  
242 sd = 83 k), respectively. After individual samples with high missing data were removed, a total of 19 populations  
243 with at least 20 individuals per population was retained (Table 1). The amplicons, not including primer sequence,  
244 were on average 168 bp (min = 84 bp; max = 188 bp). Markers were identified that had excess heterozygosity  
245 (Figure S1; n = 35 markers) or excess missing data across samples (n = 19). Removing these markers left a total of  
246 526 amplicons. Five of these markers were monomorphic across the populations genotyped, leaving 521 remaining  
247 amplicons, with a single SNP designated per amplicon. This reduced set of markers is the quality controlled marker  
248 set (Additional File S2). After all of the quality control, on average there were 111 samples per population (sd = 98  
249 samples).

250 To determine the appropriate minimum sample size threshold per population, all populations with at least  
251 20 individuals were clustered into a dendrogram (Figure S2). The groupings of populations with 35 or fewer  
252 individuals (i.e., Bear River, Falls Creek, Kitimat River, Carroll Creek, and Elwha River) were consistently outside  
253 of the main clusters. Therefore, a threshold of 35 individuals per population was applied (see Figure 1) and any  
254 populations with fewer than 35 individuals were removed from the baseline. This resulted in a total of 1,989  
255 individuals for 14 populations, with an average of 142 individuals per population (sd = 98; min = 51; max = 339).

256

257 *Hierarchical population structure*

258 The most divergent population in the dataset was Twentymile River (AK), a river at the upper end of Turnagain  
259 Arm in south-central Alaska (Figure 1). This was indicated by the relatively high genome-wide differentiation when  
260 compared to all other populations (mean  $F_{ST}$  = 0.0427; Table S1). For comparison, a population near the middle of  
261 the sampled range, Klinaklini River, compared with all other populations except Twentymile River indicates much  
262 less differentiation (mean  $F_{ST}$  = 0.0100). This distinctiveness of Twentymile River also can be observed in a

263 Principal Components Analysis (PCA) along PC2 (Figure S3). PC2 was separated by numerous markers, although  
264 some contributed more substantially to the division (Figure S4A).

265 The second largest separation in the data separated populations from the Fraser River and south, grouping  
266 the Fraser, Columbia, and Klamath Rivers (Figure 2). This separation of the northern and southern clusters had high  
267 bootstrap support (> 99.99 %), and was also apparent along PC1 of the PCA (Figure S3). PC1 was also separated  
268 by numerous markers, although ~8 markers showed a high contribution to this separation (Figure S4B). Within the  
269 southern grouping, there was some clustering of Columbia River populations together, but the Cowlitz River  
270 population, the most numerous of the Columbia River collections and entirely sourced from 2002 (Table 1), grouped  
271 into a cluster with Klamath River, and more broadly with the Fraser River (Figure 2), rather than with the other  
272 Columbia River populations (Columbia River, Sandy River). Cowlitz River and Klamath River are grouped closely  
273 together and in 87% of trees group together without the Fraser River. In general these populations were very similar  
274 (e.g., Fraser River vs. Columbia River  $F_{ST} = 0.0079$ , 95% confidence interval (CI): 0.0044-0.0130; Fraser River vs.  
275 Klamath River  $F_{ST} = 0.0021$ , 95% CI: 0.0012-0.0030; and Klamath River vs. Columbia River  $F_{ST} = 0.0091$ , 95%  
276 CI: 0.0051-0.0146; Table 2).

277 Within the northern grouping, there was a strongly supported cluster including the populations in Johnstone  
278 Strait (Kingcome River and Klinaklini River; 99.8% bootstrap support) and more broadly with Bella Coola (86.84%  
279 bootstrap support; Figure 2). These populations had high genetic similarity with each other (mean  $F_{ST} = 0.0021$ ;  
280 Table S1). Second, other Central Coast populations Kemano River and Wannock River were grouped together and  
281 were highly similar (93.56% bootstrap;  $F_{ST} = 0.0043$ , 95% CI: 0.0029-0.0059). Although Bella Coola River and  
282 Wannock River did not group in the same cluster as may be expected due to physical proximity, they still showed  
283 low differentiation ( $F_{ST} = 0.005$ , 95% CI: 0.0034-0.0068). North Coast populations Nass River and Skeena River  
284 were nearly indistinguishable (87% bootstrap;  $F_{ST} = 0.0009$ , 95% CI: 0.0002-0.0016). The Nass River was more  
285 differentiated from the Klinaklini River, for example ( $F_{ST} = 0.006$ , 95% CI: 0.0036-0.0085). The Transboundary  
286 Region's Unuk River clustered outside of the North Coast and Central Coast groupings, but still within the larger  
287 northern grouping. Importantly, Bella Coola River also showed low differentiation from both the Skeena River, and  
288 the Unuk River ( $F_{ST} = 0.0016$ , 95% CI: 0.0008-0.0025; and  $F_{ST} = 0.0021$ , 95% CI: 0.0007-0.0038, respectively).

289           Although there are three clear groupings in the data (Gulf of Alaska, northern populations, southern  
290 populations), as expected from previous work (Candy et al. 2015), and initially appear to indicate evidence for  
291 Isolation-by-Distance (IBD) with a linear relationship between pairwise  $F_{ST}$  and physical distance (km; adjusted  $R^2$   
292 = 0.71; Figure 3A), the observed IBD does not exist within regions, where the populations in the southern region  
293 and northern region do not individually show IBD (adj.  $R^2$  = 0.009 and 0.166, respectively; Figure 3C and 3D), and  
294 thus are more reflective of a hierarchical island model. Using five tentative reporting units (repunits; i.e., grouping  
295 of similar populations) as viewed in the dendrogram and shown by appended regional information in Figure 2, an  
296 analysis of molecular variation (AMOVA) was used to view the partitioning of variance within groupings. Although  
297 the majority of variation is among individuals within populations (96.34%), the between repunit variation was  
298 2.13%, whereas the between samples within repunit was 1.53% (Table 3).

299

### 300 *Annual variance in allele frequencies*

301 Applying the minimum sample size threshold of 35, several populations had sufficient sample sizes to split into  
302 different years, maintaining the  $n = 35$  threshold for each population-year combination. Populations with multiple  
303 year groups included Bella Coola River, Kingcome River, Skeena River, Klamath River, and Fraser River (Figure  
304 S5 and Figure S6). For these populations, there was often close clustering of the different collection years, but not  
305 always. For example, close clustering occurred for Skeena River 2010 and 2013 (but not 2001), Klamath River 2013  
306 and 2014, Kingcome River 2002 and 2012, Bella Coola River 1998 and 2017 (but not 2013 or 2018). The Fraser  
307 River 2014 collection clustered away from the Columbia River collections, but both the 2019 and especially the  
308 2018 collections were more similar to the Columbia River populations, although bootstrap support values for these  
309 positions were low. Further demonstration of this by  $F_{ST}$  indicates that Bella Coola River 1998 and 2017 collections,  
310 Klamath River 2013 and 2014 collections, and Skeena River 2001 vs. 2010 and 2013 were not significantly different  
311 from zero (Table 4). The annual variation was highest in the Fraser, with  $F_{ST}$  95% CI ranging from a lower limit of  
312 0.0032 to an upper limit of 0.0106, with the largest difference between Fraser 2014 and 2018.

313 *Inter-individual relatedness*

314 Relatedness of individuals within a collection was calculated using both the *wang* and *ritland* estimators (Figure  
315 S7). Consistencies were noted between the estimators finding numerous outlier related individuals for the Fraser  
316 River, Kingcome River, and Wannock River collections. The *ritland* estimator found highly related individuals  
317 within the Twentymile River collection (Figure S7A), but this was not consistent with the *wang* statistic, which  
318 showed reduced relatedness for this collection (Figure S7B). Notably, the Ritland statistic is more impacted by  
319 siblings in the data (Wang 2002).

320

321 *Comparison with microsatellite data*

322 The microsatellite data were obtained from the most recent database that was originally analyzed in Beacham et al.  
323 (2005), with augmentation of several stocks including the newly genotyped Klamath River samples. In total, 13  
324 populations were retained that were common with the SNP baseline and that had greater than 35 individuals per  
325 population (Figure S8). On average for the microsatellite data, there were 269 individuals per population (sd = 222;  
326 min = 69; max = 736).

327         The general trend of the data was similar between the SNP and microsatellite results, with a large divide  
328 between the populations to the south of the Fraser River, inclusive, and the populations to the north of the Fraser  
329 River, with Twentymile River as an outgroup (Figure S9). For the microsatellite data, Unuk River was also identified  
330 to be an outgroup to the rest of the data. The bootstrap support for the northern and southern general groupings using  
331 SNPs (99.99% and 100%, respectively) was higher than that for the microsatellite data (87.92% and 85.81%,  
332 respectively). The grouping of the Central Coast and Johnstone Strait (CC-JS) was much less apparent in the  
333 microsatellite data, and the Fraser River grouped closely with the Columbia River and south populations in the  
334 microsatellite data as well. Interestingly, in both the microsatellite and SNP data, Cowlitz River, Klamath River,  
335 and Fraser River grouped together more than any of these grouped with the Columbia River collection (2000).  
336 Overall, bootstrap support was higher in the SNP data than the microsatellite, where the SNP data bootstrap values  
337 were on average 86.17% (n = 11 values) whereas for the microsatellite data the bootstrap values were on average  
338 64.02% (n = 10 values).

339 The microsatellite data also showed evidence for IBD across regions (hierarchical island model), with in  
340 general a lower overall range of  $F_{ST}$  values (Figure S10;  $F_{ST}$  range: 0 - ~0.012) than that observed in the SNP data  
341 (Figure 3;  $F_{ST}$  range = 0 - ~0.045), although this was expected due to the different technologies. There was also less  
342 of a gap between the regions in the microsatellite data, most notably with the largest distance populations (i.e., Gulf  
343 of Alaska vs. southern populations). Further, the trend was less linear for the microsatellite data (microsatellite adj.  
344  $R^2 = 0.48$ ; SNP adj.  $R^2 = 0.71$ ). In the microsatellite data, some population comparisons were not significantly  
345 different from zero ( $F_{ST} = 0$ ; Table S2). Similarly, the AMOVA for microsatellite data put into regions as determined  
346 in the SNP data and geographically (Table S3) shows that only 0.66% of the variation exists between repunits  
347 relative to the 2.13% explained in the SNP data. The microsatellite data showed 0.08% of the variation in the data  
348 existed between samples within repunit, and 99.26% remaining within samples.

349

350

## DISCUSSION

351 Improved genetic techniques may advance our understanding of the ecologically and culturally important eulachon,  
352 for example to address questions about reasons for declines in some populations and healthy returns in others that  
353 are in nearby rivers. These techniques may further our understanding of eulachon in the ocean, including their  
354 distribution, how stocks mix at-sea, what populations end up in by-catch and where this occurs, and what populations  
355 are being characterized in scientific surveys. Here we present a SNP amplicon panel and improved eulachon baseline  
356 (14 populations, 1,989 individuals) using 521 differentiating markers sourced from a RADseq study (Candy et al.  
357 2015) combined with a contig-level genome assembly (Sutherland et al. in prep).

358 The newly developed panel outperforms the existing microsatellite panel (Beacham et al. 2005; Kaukinen  
359 et al. 2004) as demonstrated by levels of bootstrap support in dendrograms, improved clustering of populations by  
360 geographic region, improved clustering with fewer samples included in the baseline, increased adherence to the  
361 expected isolation-by-distance across regions model (hierarchical island model), and increased genetic variance  
362 captured within and between groupings (i.e., repunits). Putative adaptive markers in the panel have been found to  
363 provide higher levels of differentiation compared to the neutral markers and should provide a better understanding  
364 of different selective pressures occurring over the eulachon range (Candy et al. 2015). The new SNP panel is  
365 commercially available (Thermo Fisher) and primer sequences are provided herein (Additional File S1).

366 With the SNP marker panel, three main, large-scale groupings are observed, with some sub-structure within  
367 each. This includes the Gulf of Alaska (GoA), southeast Alaska and northern BC, and southern BC through the  
368 contiguous US. The northern grouping may yield further subdivision into the Southeast Alaska/North Coast (SEAK-  
369 NC) and Central Coast/Johnstone Strait (CC-JS) reporting units, although the true separation of these populations  
370 requires additional study through simulations. The southern grouping may yield further subdivision into the Fraser  
371 River (FR) and the contiguous US Pacific Northwest (PNW), which also requires further study. Evaluating the  
372 effectiveness of more granular resolution within the three identified groups is an important next step for this work,  
373 and will be useful to combine both simulated data with empirical data to determine the optimal resolution that can  
374 be achieved.

375

### 376 *Regional grouping, isolation-by-distance, and annual variation*

377 Although in general, a hierarchical island model with IBD between regions, but not within regions, explains the  
378 variation in the dataset. Within-region IBD was also not identified in a recent study of eulachon in Alaska, where  
379 the data were more fit to a hierarchical island model rather than IBD within regions, which was explained as  
380 potentially due to large-scale oceanic currents and larval dispersal (Flannery et al. 2013). In the present study, Bella  
381 Coola, Klinaklini and Kingcome River populations grouped closely, but the Wannock and Kemano River  
382 populations from the similar region grouped separately. The cause of the close grouping of these two separate groups  
383 is unknown, but could reflect genetic variation associated with run timing (Table S4) or aspects of habitat differences  
384 in the area (e.g., local hydrology). However, the genetic differentiation across these groupings is still low.

385 For eulachon, run timing may depend on both water temperature and river discharge rate in local river basins  
386 (Langer et al. 1977; Ricker et al. 1954; Smith and Saalfeld 1955). Run timing variation can indicate the potential for  
387 local adaptation (Beacham *et al.* 2005). Run timing variation occurs across different rivers, generally but not always  
388 along a latitudinal gradient (Hay and McCarter 2000; Moody and Pitcher 2010). Peak run timing of eulachon (Table  
389 S4) ranges from February in the south (e.g., Columbia River; WDFW & ODFW 2005), March in Central and North  
390 coasts (e.g., Kemano, Bella Coola, Skeena, Nass rivers; Moody 2008) or April (e.g., Kingcome and Klinaklini;  
391 Southeast Alaska; ADF&G 2008; Moody 2008), and May in Alaska (e.g., Central and Western Alaska; Moody  
392 2008). In contrast to the latitudinal trend, Fraser River (DFO 2020), Sandy River, and Klamath River (Larson and



393 Belchik 1998) have run timing in late March or early April (reviewed in Moody 2008). However, long-term trends  
394 toward earlier return timing of eulachon have been noted in several rivers (COSEWIC 2011; Gustafson et al., in  
395 prep; Moody and Pitcher 2010), and these trends are likely associated with increasing river temperatures or changes  
396 in peak river flows. When environmental conditions are different among locations, and selection acts upon adaptive  
397 variants fit to these conditions, local adaptation is possible if sufficient isolation among populations occurs. Low  
398 genetic differentiation between populations suggests low drift and/or high gene flow, which reduces but does not  
399 preclude the potential for local adaptation. Whether the close genetic similarity observed for Wannock and Kemano  
400 river populations and similarly for Bella Coola, Kingcome, and Klinaklini rivers, is due to local environmental  
401 differences at each location (e.g., river hydrology) is an interesting avenue for future investigation; additional  
402 samples from each of the two different groupings should provide more insight as to whether this trend remains.

403         The present study found consistent grouping of populations separated by year of collection, such as the  
404 Klamath River and Kingcome River, for some but not all collections of Skeena River and Bella Coola River, and  
405 slightly higher differentiation across years for the Fraser River. Nonetheless, for the most part, groupings stayed  
406 within their putative reporting unit, and always within their larger regions (i.e., the three main groupings). This is  
407 consistent with other studies finding a greater effect of geography than temporal variation (Beacham et al. 2005).  
408 Sampling multiple years is a useful method of reducing the variance inherent in collections across years (Waples  
409 1998), and has been highlighted as a valuable step to evaluate potential for mixed-stock analysis accuracy (Flannery  
410 et al. 2013). In addition, with climate change scenarios and expected changes in the distribution of species, it will  
411 be informative to continue collecting baseline samples in future years to ensure trends remain consistent. It is  
412 interesting to note that there may be multiple runs per river, having peak spawning time at different dates, as has  
413 been observed in the Nass River, with an initial run arriving in early to mid March, and a second run arriving in  
414 early April (COSEWIC 2013; Langer et al. 1977; Noble et al. 2012), as well as the Kingcome River (Gustafson et  
415 al. 2010), the Fraser River (LFFA 2015), the Elwha River (Gustafson 2016), and others throughout the range. If this  
416 hidden variation within a river is not included, for example in metadata of collections, it could lead to variance  
417 occurring across sampling years if there is only a single sampling event per year.

418 *Genetics and current management groupings*

419 Gustafson et al. (2012) identified one Distinct Population Segment (DPS) of eulachon in the California Current.  
420 DPSs to the north of the Skeena River were not identified, as the Status Review teams' mandate was to identify a  
421 DPS of eulachon that contained the petitioned populations of eulachon from the states of California, Oregon, and  
422 Washington, and not to identify DPSs coastwide. Gustafson et al. (2012) suggest the strong ecological and  
423 environmental break that occurs between the Alaska and California Currents provide support for discreteness of  
424 eulachon within the California Current.

425         The three Designatable Units (DUs) within Canada (COSEWIC 2011) correspond well with genetic  
426 structure observed here, although it is not entirely clear where the separation point exists between the Nass/Skeena  
427 DU and the Central Coast, either around Bella Coola or Johnstone Strait. The Nass and Skeena River populations  
428 are very similar genetically to the Kemano and Wannock River populations, suggesting these should be collectively  
429 considered as one grouping. However, the Nass and Skeena River populations are also very similar genetically to  
430 the Bella Coola River population. Whether the Kingcome, Bella Coola, and Klinaklini rivers are distinct enough  
431 from these other Central and North Coast populations for sufficient resolution in mixed-stock analysis is an  
432 important next step to this work. The present results are in agreement with previous results suggesting high gene  
433 flow between the Nass River and Skeena River populations (see COSEWIC 2013). Additional baseline samples in  
434 future years should continue to help resolve the groupings and monitor for any changes. These will be continued to  
435 be added to the existing baseline, as multiple year collections are known to reduce the potential for single year  
436 sampling biases.

437

438 **CONCLUSIONS**

439 Based on genetic evidence, the current baseline with populations from Klamath River in California through coastal  
440 British Columbia and north to Twentymile River in Alaska is tentatively grouped into five reporting units. The  
441 current SNP panel outperformed the microsatellite panel and will be applied to mixed-stock analysis. Low genetic  
442 differentiation was observed overall compared to other anadromous species such as salmonids, and a hierarchical  
443 island model best explained the structure observed here. Annual differences in collections were characterized, and  
444 although in general collections clustered together regardless of year, some variance existed, indicating the value of

445 having these multiple year collections in the data. Several clustering trends remain unexplained, but may be related  
446 to run timing or hydrological differences of the rivers. Although improvements are expected as the baseline  
447 continues to grow, the current baseline is a foundation that will be used for subsequent mixed-stock analysis.  
448 Important next steps will involve simulating and testing mixed-stock samples to determine the reliability of the five  
449 reporting units proposed here from the population structure analysis.

450

451

## ACKNOWLEDGEMENTS

452 This work was supported by funds from Fisheries and Oceans Canada (DFO) Rotational Survey Fund, as well as  
453 the Species At Risk program (SARA). We thank First Nations and Fisheries and Oceans Canada staff for the  
454 eulachon collections along the coast of British Columbia, staff from the Washington Department of Fisheries (DFW)  
455 for collections from Washington, and staff from Alaska Department of Fish & Game, US Fish & Wildlife Service,  
456 and the University of Alaska Fairbanks for collections from Alaska. Thanks to the following people and groups for  
457 samples collected since 2015: Bella Coola River samples were provided by the Nuxalk Nation (Jason Moody and  
458 Megan Moody); Fraser River samples were provided by the Lower Fraser Fisheries Alliance (LFFA); Klamath River  
459 samples were provided by the Yurok Tribal Fisheries Program, Klamath River Division (Barry McCovey Jr. and  
460 Michael Belchik); Elwha River samples were provided by the Lower Elwha Klallam Tribe (Mike McHenry); Skeena  
461 River 2019 samples were provided by DFO (Vanessa Hodes and Lindsay Dealy); Sandy River samples were  
462 provided by Maureen Small of DFW; and Nass and Skeena River (2013), Unuk River, and Wannock River samples  
463 were provided by DFO (Matt Thompson). Thanks to Ashtin Duguid (DFO) and Ana Ramon-Laca (NMFS) for help  
464 with additional DNA extractions. Thanks to Haktan Suren and Prasad Siddavatam and the rest of the Thermo Fisher  
465 Scientific team for development of commercial primers for eulachon. Thanks to Alejandro Frid and Megan Moody  
466 for comments on an earlier version of the manuscript.

## 467 **DATA ACCESSIBILITY**

468 The raw data for this analysis is available on the NCBI Short Read Archive (SRA) under BioProject Accession  
469 PRJNA635905 within BioSamples SAMN15057088-SAMN15060309. The original RAD-seq data are available  
470 within Candy et al. (2015). The eulachon ampliseq panel can be ordered using the following catalogue number  
471 from Thermo Fisher: SKU A44467 AgriSeq Custom Panel –DFO\_EULACHON20180627. Additional Files  
472 including the primers for the eulachon panel and the hotspot file outlining variants and positions can be found on  
473 FigShare: <https://doi.org/10.6084/m9.figshare.12922538.v2>

474 The analytical pipelines applied in this work are all available on GitHub, including:  
475 Extend RAD marker using genome: [https://github.com/bensutherland/fasta\\_SNP\\_extraction](https://github.com/bensutherland/fasta_SNP_extraction)  
476 Analyze population genetic data: [https://github.com/bensutherland/simple\\_pop\\_stats](https://github.com/bensutherland/simple_pop_stats)

477

## 478 **SUPPLEMENTAL INFORMATION**

479 **Additional File S1.** Primers for the eulachon panel.

480 **Additional File S2.** Hotspot file outlining variants and positions.

481

482 **Table S1.** Amplicon panel pairwise genetic differentiation estimates.

483 **Table S2.** Microsatellite panel pairwise genetic differentiation estimates.

484 **Table S3.** Microsatellite panel variance sources as determined by Analysis of Molecular Variance (AMOVA).

485 **Table S4.** Run timing differences for eulachon populations relevant to the study.

486

487 **Figure S1.** Amplicon panel observed heterozygosity per marker.

488 **Figure S2.** Amplicon panel dendrogram showing genetic similarity among populations in the baseline including  
489 all populations that have at least 20 individuals.

490 **Figure S3.** (A) Principle Components Analysis of the SNP baseline showing PC1 and PC2; and (B) eigenvalues of  
491 the different PCs.

492 **Figure S4.** Principle component loading values of each marker for the top three PCs.

- 493 **Figure S5.** Sample sizes in the amplicon panel baseline when separating by location and year.
- 494 **Figure S6.** Amplicon panel genetic dendrogram when considering collections separated by year.
- 495 **Figure S7.** Inter-individual relatedness within each population estimated from the data in the amplicon baseline
- 496 **Figure S8.** The microsatellite baseline sample size per collection
- 497 **Figure S9.** The microsatellite baseline dendrogram showing genetic similarity among collections. Colours
- 498 represent repunits as determined by the amplicon panel.
- 499 **Figure S10.** Physical by genetic distance comparison in the microsatellite panel

## REFERENCES

- 500  
501  
502 Ackerman, M.W., Habicht, C., and Seeb, L.W. 2011. Single-Nucleotide Polymorphisms (SNPs) under  
503 Diversifying Selection Provide Increased Accuracy and Precision in Mixed-Stock Analyses of Sockeye  
504 Salmon from the Copper River, Alaska. *Transactions of the American Fisheries Society* **140**(3): 865-881.  
505 doi:10.1080/00028487.2011.588137.
- 506 ADF&G. 2008. Wildlife Notebook Series: Eulachon. *In* Wildlife Notebook Series. *Edited by* A.D.o.F. Game. p. 1.  
507 Altschul, S.F., Gish, W., Miller, W., Myers, E.W., and Lipman, D.J. 1990. Basic local alignment search tool.  
508 *Journal of Molecular Biology* **215**(3): 403-410.
- 509 Beacham, T.D., Hay, D.E., and Le, K.D. 2005. Population structure and stock identification of Eulachon  
510 (*Thaleichthys pacificus*), an anadromous smelt, in the Pacific northwest. *Marine biotechnology* (New  
511 York, N.Y.) **7**(4): 363-372. doi:10.1007/s10126-004-4075-0.
- 512 Beacham, T.D., McIntosh, B., and Wallace, C.G. 2011. A comparison of polymorphism of genetic markers and  
513 population sample sizes required for mixed-stock analysis of sockeye salmon (*Oncorhynchus nerka*) in  
514 British Columbia. *Canadian Journal of Fisheries and Aquatic Sciences* **68**(3): 550-562. doi:10.1139/F10-  
515 167.
- 516 Beacham, T.D., Wallace, C., MacConnachie, C., Jonsen, K., McIntosh, B., Candy, J.R., Devlin, R.H., and Withler,  
517 R.E. 2017. Population and individual identification of coho salmon in British Columbia through  
518 parentage-based tagging and genetic stock identification: an alternative to coded-wire tags. *Canadian*  
519 *Journal of Fisheries and Aquatic Sciences* **74**(9): 1391-1410. doi:10.1139/cjfas-2016-0452.
- 520 Beacham, T.D., Wallace, C., Jonsen, K., McIntosh, B., Candy, J.R., Willis, D., Lynch, C., Moore, J.-S.,  
521 Bernatchez, L., and Withler, R.E. 2019. Comparison of coded-wire tagging with parentage-based tagging  
522 and genetic stock identification in a large-scale coho salmon fisheries application in British Columbia,  
523 Canada. *Evol Appl* **12**(2): 230-254. doi:10.1111/eva.12711.
- 524 Campbell, N.R., Harmon, S.A., and Narum, S.R. 2015. Genotyping-in-Thousands by sequencing (GT-seq): A cost  
525 effective SNP genotyping method based on custom amplicon sequencing. *Mol. Ecol. Resour.* **15**(4): 855-  
526 867. doi:10.1111/1755-0998.12357.
- 527 Candy, J.R., Wallace, C.G., and Beacham, T.D. 2002. Microsat Manager: an application for multi-locus genetic  
528 data, user's guide and documentation. *Canadian Technical Report of Fisheries and Aquatic Sciences* **2407**.
- 529 Candy, J.R., Campbell, N.R., Grinnell, M.H., Beacham, T.D., Larson, W.A., and Narum, S.R. 2015. Population  
530 differentiation determined from putative neutral and divergent adaptive genetic markers in Eulachon  
531 (*Thaleichthys pacificus*, Osmeridae), an anadromous Pacific smelt. *Mol Ecol Resour* **15**(6): 1421-1434.  
532 doi:10.1111/1755-0998.12400.
- 533 Cavalli-Sforza, L.L., and Edwards, A.W. 1967. Phylogenetic analysis: models and estimation procedures. *Am J*  
534 *Hum Genet* **19**(3): 233-257.
- 535 COSEWIC. 2011. Assessment and Status Report on the Eulachon *Thaleichthys pacificus* Nass/Skeena Rivers  
536 population, Central Pacific Coast population, Fraser River population in Canada. Committee on the Status  
537 of Endangered Wildlife in Canada, COSEWIC, Ottawa.
- 538 COSEWIC. 2013. Assessment and status report on the Eulachon *Thaleichthys pacificus* Nass/Skeena population in  
539 Canada. Committee on the Status of Endangered Wildlife in Canada, COSEWIC, Ottawa.
- 540 DFO. 2015. Recovery potential assessment for Eulachon - Fraser River Designatable Unit. F.a.O.C. (DFO).  
541 DFO. 2020. 2020 Eulachon Integrated Fisheries Management Plan - Fraser River. Fisheries and Oceans Canada,  
542 F.a.O.C. (DFO), Fisheries and Oceans Canada, Pacific Region.
- 543 Dray, S., and Dufour, A. 2007. The ade4 package: implementing the duality diagram for ecologists. *Journal of*  
544 *Statistical Software* **22**(4): 1-20. doi:10.18637/jss.v022.i04.
- 545 Essington, T.E., Siple, M.C., Hodgson, E.E., Koehn, L.E., Moriarty, P.E., Oken, K.L., and Stawitz, C.C. 2015a.  
546 Reply to Szuwalski and Hilborn: Forage fish require an ecosystem approach. *Proceedings of the National*  
547 *Academy of Sciences* **112**(26): E3316. doi:10.1073/pnas.1508822112.
- 548 Essington, T.E., Moriarty, P.E., Froehlich, H.E., Hodgson, E.E., Koehn, L.E., Oken, K.L., Siple, M.C., and  
549 Stawitz, C.C. 2015b. Fishing amplifies forage fish population collapses. *Proceedings of the National*  
550 *Academy of Sciences* **112**(21): 6648. doi:10.1073/pnas.1422020112.



- 551 Flannery, B.G., Spangler, R.E., Norcross, B.L., Lewis, C.J., and Wenburg, J.K. 2013. Microsatellite analysis of  
552 population structure in Alaska Eulachon with application to mixed-stock analysis. *Transactions of the*  
553 *American Fisheries Society* **142**(4): 1036-1048. doi:10.1080/00028487.2013.790841.
- 554 Gagnaire, P.-A., Broquet, T., Aurelle, D., Viard, F., Souissi, A., Bonhomme, F., Arnaud-Haond, S., and Bierne, N.  
555 2015. Using neutral, selected, and hitchhiker loci to assess connectivity of marine populations in the  
556 genomic era [10.1111/eva.12288]. *Evol Appl* **8**(8): 769-786.  
557 doi:papers3://publication/doi/10.1111/eva.12288.
- 558 Goudet, J. 2005. hierfstat, a package for R to compute and test hierarchical F-statistics [10.1111/j.1471-8278].  
559 *Molecular Ecology Notes* **5**: 184-186. doi:papers3://publication/doi/10.1111/j.1471-8278.
- 560 Gruber, B., Unmack, P.J., Berry, O.F., and Georges, A. 2018. dartr: An r package to facilitate analysis of SNP data  
561 generated from reduced representation genome sequencing. *Mol. Ecol. Resour.* **18**(3): 691-699.  
562 doi:10.1111/1755-0998.12745.
- 563 Guénette, S., Melvin, G., and Bundy, A. 2014. A review of the ecological role of forage fish and management  
564 strategies. F.a.O.C. (DFO), Dartmouth, NS.
- 565 Gustafson, R.G. 2016. Status review update of eulachon (*Thaleichthys pacificus*) listed under the Endangered  
566 Species Act: southern distinct population segment., Seattle, WA.
- 567 Gustafson, R.G., Ford, M.J., Teel, D.J., and Drake, J.S. 2010. Status review of eulachon (*Thaleichthys pacificus*)  
568 in Washington, Oregon, and California. Seattle, WA.
- 569 Gustafson, R.G., Ford, M.J., Adams, P.B., Drake, J.S., Emmett, R.L., Fresh, K.L., Rowse, M., Spangler, E.A.K.,  
570 Spangler, R.E., Teel, D.J., and Wilson, M.T. 2012. Conservation status of Eulachon in the California  
571 Current. *Fish and Fisheries* **13**(2): 121-138. doi:10.1111/j.1467-2979.2011.00418.x.
- 572 Hauser, L., and Carvalho, G.R. 2008. Paradigm shifts in marine fisheries genetics: ugly hypotheses slain by  
573 beautiful facts. *Fish and Fisheries* **9**(4): 333-362. doi:10.1111/j.1467-2979.2008.00299.x.
- 574 Hauser, L., Baird, M., Hilborn, R.A.Y., Seeb, L.W., and Seeb, J.E. 2011. An empirical comparison of SNPs and  
575 microsatellites for parentage and kinship assignment in a wild sockeye salmon (*Oncorhynchus nerka*)  
576 population. *Mol. Ecol. Resour.* **11**(s1): 150-161. doi:10.1111/j.1755-0998.2010.02961.x.
- 577 Hay, D., and McCarter, P.B. 2000. Status of the eulachon *Thaleichthys pacificus* in Canada. F.a.O. Science.
- 578 Hedgecock, D., and Pudovkin, A.I. 2011. Sweepstakes reproductive success in highly fecund marine fish and  
579 shellfish: a review and commentary [10.5343/bms.2010.1051]. *Bulletin of Marine Science* **87**(4): 971-  
580 1002. doi:papers3://publication/doi/10.5343/bms.2010.1051.
- 581 Hess, J.E., Matala, A.P., and Narum, S.R. 2011. Comparison of SNPs and microsatellites for fine-scale application  
582 of genetic stock identification of Chinook salmon in the Columbia River Basin. *Mol. Ecol. Resour.* **11**(s1):  
583 137-149. doi:10.1111/j.1755-0998.2010.02958.x.
- 584 Hijmans, R.J. 2019. geosphere: Spherical trigonometry.
- 585 Jombart, T. 2008. adegenet: a R package for the multivariate analysis of genetic markers  
586 [10.1093/bioinformatics/btn129]. *Bioinformatics* **24**(11): 1403-1405.  
587 doi:papers3://publication/doi/10.1093/bioinformatics/btn129.
- 588 Kamvar, Z.N., Tabima, J.F., and Grunwald, N.J. 2014. Poppr: an R package for genetic analysis of populations  
589 with clonal, partially clonal, and/or sexual reproduction. *PeerJ* **2**: e281. doi:10.7717/peerj.281.
- 590 Kaukinen, K.H., Supernault, K.J., and Miller, K.M. 2004. Development of microsatellite loci in Eulachon  
591 (*Thaleichthys pacificus*). *Molecular Ecology Notes* **4**(4): 632-634. doi:10.1111/j.1471-8286.2004.00742.x.
- 592 Kraemer, P., and Gerlach, G. 2017. Demerelate: calculating interindividual relatedness for kinship analysis based  
593 on codominant diploid genetic markers using R. *Mol. Ecol. Resour.* **17**(6): 1371-1377. doi:10.1111/1755-  
594 0998.12666.
- 595 Langer, O.E., Shepherd, B.G., and Vroom, P.R. 1977. Biology of the Nass River Eulachon (*Thaleichthys*  
596 *pacificus*).
- 597 Larson, Z.S., and Belchik, M.R. 1998. A preliminary status review of Eulachon and Pacific Lamprey in the  
598 Klamath River Basin. Yurok Tribal Fisheries Program, Klamath, CA.
- 599 LFFA. 2015. What do we know about Fraser River Eulachon? A snapshot of First Nations' knowledge and the  
600 state of the science on this stock. . Lower Fraser Fisheries Alliance (LFFA).
- 601 Marston, B., H., Willson, M., F., and Gende, S., M. 2002. Predator aggregations during eulachon *Thaleichthys*  
602 *pacificus* spawning runs. *Mar. Ecol. Prog. Ser.* **231**: 229-236.



- 603 McLean, J.E., and Taylor, E.B. 2001. Resolution of population structure in a species with high gene flow:  
604 microsatellite variation in the eulachon (Osmeridae: *Thaleichthys pacificus*). *Mar Biol* **139**(3): 411-420.  
605 doi:10.1007/s002270100483.
- 606 McLean, J.E., Hay, D.E., and Taylor, E.B. 1999. Marine population structure in an anadromous fish: life-history  
607 influences patterns of mitochondrial DNA variation in the eulachon, *Thaleichthys pacificus*. *Mol Ecol*  
608 **8**(12 Suppl 1): S143-158. doi:10.1046/j.1365-294x.1999.00818.x.
- 609 Meek, M.H., and Larson, W.A. 2019. The future is now: Amplicon sequencing and sequence capture usher in the  
610 conservation genomics era. *Mol. Ecol. Resour.* **19**(4): 795-803. doi:10.1111/1755-0998.12998.
- 611 Moody, M.F. 2008. Eulachon past and present. Resource Management and Environmental Studies, The University  
612 of British Columbia, Vancouver.
- 613 Moody, M.F., and Pitcher, T. 2010. Eulachon (*Thaleichthys pacificus*): past and present. Fisheries Centre,  
614 University of British Columbia, U.o.B. Columbia, Vancouver, BC.
- 615 NMFS. 2010. Endangered and threatened wildlife and plants: threatened status for southern distinct population  
616 segment of Eulachon.
- 617 NMFS. 2017. Recovery plan for the southern Distinct Population Segment of Eulachon (*Thaleichthys pacificus*).  
618 Portland, OR.
- 619 Noble, C., Duguid, W., Bocking, R.C., Morven, N., and Stephens, C. 2012. Nisga'a Fish and Wildlife Department  
620 Nass River Eulachon harvest monitoring program 1997-2012. Nisga'a Lisims Government, Sidney, BC  
621 and New Aiyansh, BC.
- 622 Ormseth, O.A. 2018. Status of forage species in the Gulf of Alaska region. North Pacific Fishery Management  
623 Council.
- 624 Ormseth, O.A., Connors, L., Guttormsen, M., and Vollenweider, J. 2008. Forage fishes in the Gulf of Alaska.  
625 North Pacific Fishery Management Council, Anchorage.
- 626 Pew, J., Muir, P.H., Wang, J., and Frasier, T.R. 2015. related: an R package for analysing pairwise relatedness  
627 from codominant molecular markers. *Mol. Ecol. Resour.* **15**(3): 557-561. doi:10.1111/1755-0998.12323.
- 628 Pritchard, E.K., Rountos, K.J., Essington, T.E., Santora, C., Pauly, D., Watson, R., Sumaila, U.R., Boersma, P.D.,  
629 Boyd, I.L., Conover, D.O., Cury, P., Heppell, S.S., Houde, E.D., Mangel, M., Plagányi, É., Sainsbury, K.,  
630 Steneck, R.S., Geers, T.M., Gownaris, N., and Munch, S.B. 2014. The global contribution of forage fish to  
631 marine fisheries and ecosystems. *Fish and Fisheries* **15**(1): 43-64. doi:10.1111/faf.12004.
- 632 Quinlan, A.R., and Hall, I.M. 2010. BEDTools: a flexible suite of utilities for comparing genomic features.  
633 *Bioinformatics* **26**(6): 841-842. doi:10.1093/bioinformatics/btq033.
- 634 R Core Team. 2020. R: A language and environment for statistical computing. *In* R Foundation for Statistical  
635 Computing. R Foundation for Statistical Computing, Vienna, Austria.
- 636 Rambaut, A. 2019. FigTree.
- 637 Ricker, W.E., Manzer, D.F., and Neave, E.A. 1954. The Fraser River Eulachon fishery. F.R.B.o. Canada.
- 638 Ritland, K. 1996. Estimators for pairwise relatedness and individual inbreeding coefficients. *Genetical Research*  
639 **67**(2): 175-185. doi:10.1017/S0016672300033620.
- 640 Schweigert, J., Wood, C., Hay, D., McAllister, M., Boldt, J., McCarter, B., Therriault, T.W., and Brekke, H. 2012.  
641 Recovery potential assessment of Eulachon (*Thaleichthys pacificus*) in Canada.
- 642 Slatkin, M., and Voelm, L. 1991. FST in a hierarchical island model. *Genetics* **127**(3): 627.
- 643 Slowikowski, K. 2019. ggrepel: Automatically position non-overlapping text labels with ggplot2.
- 644 Smith, W.E., and Saalfeld, R.W. 1955. Studies on Columbia River smelt *Thaleichthys pacificus* (Richardson).  
645 W.D.o. Fisheries, Olympia, Washington.
- 646 Szuwalski, C.S., and Hilborn, R. 2015. Environment drives forage fish productivity. *Proceedings of the National*  
647 *Academy of Sciences* **112**(26): E3314. doi:10.1073/pnas.1507990112.
- 648 Wang, J. 2002. An Estimator for Pairwise Relatedness Using Molecular Markers. *Genetics* **160**(3): 1203-1215.
- 649 Wang, J. 2011. COANCESTRY: a program for simulating, estimating and analysing relatedness and inbreeding  
650 coefficients. *Mol Ecol Resour* **11**(1): 141-145. doi:10.1111/j.1755-0998.2010.02885.x.
- 651 Waples, R.S. 1998. Separating the wheat from the chaff: patterns of genetic differentiation in high gene flow  
652 species. *J. Hered* **89**(5): 438-450. doi:papers3://publication/uuid/E6DF7D70-A7BA-4D5F-A8AE-  
653 BB54D5F191A7.
- 654 WDFW & ODFW. 2005. Joint staff report concerning commercial seasons for sturgeon and smelt in 2006. .

- 655 Weir, B.S., and Cockerham, C.C. 1984. Estimating F-statistics for the analysis of population structure. *Evolution*  
656 **38**(6): 1358-1370. doi:10.1111/j.1558-5646.1984.tb05657.x.
- 657 Wickham, H. 2016. *ggplot2: elegant graphics for data analysis*. Springer-Verlag, New York.
- 658
- 659

660

## TABLES

661 **Table 1.** Populations and years included in the study retained after quality control of baseline shown within larger  
 662 groupings (i.e., repunits) and approximate location (GPS). The number of samples from each year as well as the  
 663 total number of samples for the collection are shown (n). Collections are also shown whether each was in the  
 664 original marker discovery (i.e., Candy et al. 2015).  
 665

| Repunit | Collection     | Sampling Year (n)                                             | Tot. (n) | Approx. Location (GPS) | Incl. in marker discovery? (n) |
|---------|----------------|---------------------------------------------------------------|----------|------------------------|--------------------------------|
| GoA     | Twentymile R.  | 2001 (99)                                                     | 99       | 60.8454, -148.9854     | 2001 (32)                      |
| SEAK-NC | Unuk R.        | 2011 (14)<br>2012 (37)                                        | 51       | 56.0543, -131.0251     | -<br>-                         |
| SEAK-NC | Nass R.        | 2008 (4)<br>2013 (92)                                         | 96       | 54.9769, -129.8894     | 2008 (41)<br>-                 |
| SEAK-NC | Skeena R.      | 2001 (40)<br>2010 (95)<br>2013 (186)<br>2019 (20)             | 341      | 54.1375, -130.0944     | -<br>2010 (33)<br>-<br>-       |
| SEAK-NC | Kemano R.      | -<br>2013 (95)                                                | 95       | 53.4839, -128.1247     | 2001 (42)<br>-                 |
| SEAK-NC | Wannock R.     | 2015 (93)                                                     | 93       | 51.6789, -127.2506     | -                              |
| CC-JS   | Bella Coola R. | 1998 (78)<br>2003 (19)<br>2013 (40)<br>2017 (45)<br>2018 (59) | 241      | 52.3900, -126.7775     | -<br>2003 (33)<br>-<br>-<br>-  |
| CC-JS   | Klinaklini R.  | 2002 (87)                                                     | 87       | 51.0922, -125.6261     | 2002 (41)                      |
| CC-JS   | Kingcome R.    | 1999 (7)<br>2002 (66)<br>2012 (50)<br>2013 (4)                | 127      | 50.9500, -126.2000     | -<br>2002 (36)<br>-<br>-       |
| FR      | Fraser R.      | 2009 (30)<br>2014 (40)<br>2018 (188)<br>2019 (81)             | 339      | 49.1153, -123.1835     | 2009 (40)<br>-<br>-<br>-       |
| PNW     | Columbia R.    | 2000 (63)<br>-                                                | 63       | 46.2293, -123.6446     | -<br>2011-12 (22)              |
| PNW     | Cowlitz R.     | 2002 (181)                                                    | 181      | 46.0982, -122.9090     | 2002 (37)                      |
| PNW     | Sandy R.       | 2014 (53)                                                     | 53       | 45.5645, -122.3968     | -                              |
| PNW     | Klamath R.     | 2012 (34)<br>2013 (44)<br>2014 (45)                           | 123      | 41.5271, -124.0451     | -<br>-<br>-                    |

666

667 **Table 2.** Pairwise genetic differentiation between populations using the SNP panel as shown by Weir-Cockerham  $F_{ST}$  95% confidence limits (lower limits  
668 in the bottom half, upper limits in the upper half). Shading is used to show increasing values. Only populations with more than 35 individuals are shown.  
669 Negative values in the lower limit were replaced by zero and the comparison was considered to be not significantly different.  
670

|     | BEL    | COL    | COW    | FRA    | KEM    | KIN    | KLA    | KLI    | NAS    | SAN    | SKE    | TWE    | UNU    | WAN    |
|-----|--------|--------|--------|--------|--------|--------|--------|--------|--------|--------|--------|--------|--------|--------|
| BEL | -      | 0.0245 | 0.0192 | 0.0170 | 0.0060 | 0.0034 | 0.0200 | 0.0039 | 0.0031 | 0.0185 | 0.0025 | 0.0473 | 0.0038 | 0.0068 |
| COL | 0.0136 | -      | 0.0128 | 0.0130 | 0.0327 | 0.0258 | 0.0146 | 0.0247 | 0.0285 | 0.0122 | 0.0278 | 0.0522 | 0.0297 | 0.0291 |
| COW | 0.0113 | 0.0037 | -      | 0.0029 | 0.0286 | 0.0182 | 0.0018 | 0.0237 | 0.0222 | 0.0021 | 0.0204 | 0.0491 | 0.0208 | 0.0293 |
| FRA | 0.0095 | 0.0044 | 0.0014 | -      | 0.0270 | 0.0149 | 0.0030 | 0.0203 | 0.0201 | 0.0036 | 0.0198 | 0.0531 | 0.0203 | 0.0274 |
| KEM | 0.0024 | 0.0186 | 0.0163 | 0.0153 | -      | 0.0108 | 0.0293 | 0.0109 | 0.0054 | 0.0277 | 0.0045 | 0.0512 | 0.0071 | 0.0059 |
| KIN | 0.0015 | 0.0135 | 0.0106 | 0.0083 | 0.0058 | -      | 0.0188 | 0.0028 | 0.0072 | 0.0184 | 0.0061 | 0.0517 | 0.0086 | 0.0082 |
| KLA | 0.0116 | 0.0051 | 0.0001 | 0.0012 | 0.0169 | 0.0109 | -      | 0.0232 | 0.0211 | 0.0043 | 0.0212 | 0.0490 | 0.0202 | 0.0307 |
| KLI | 0.0014 | 0.0134 | 0.0125 | 0.0101 | 0.0057 | 0.0002 | 0.0123 | -      | 0.0085 | 0.0215 | 0.0072 | 0.0527 | 0.0087 | 0.0084 |
| NAS | 0.0008 | 0.0161 | 0.0130 | 0.0112 | 0.0026 | 0.0032 | 0.0118 | 0.0036 | -      | 0.0224 | 0.0016 | 0.0474 | 0.0031 | 0.0082 |
| SAN | 0.0104 | 0.0027 | 0      | 0.0006 | 0.0159 | 0.0108 | 0.0000 | 0.0112 | 0.0121 | -      | 0.0211 | 0.0488 | 0.0210 | 0.0271 |
| SKE | 0.0008 | 0.0159 | 0.0113 | 0.0105 | 0.0022 | 0.0028 | 0.0114 | 0.0033 | 0.0002 | 0.0115 | -      | 0.0496 | 0.0020 | 0.0077 |
| TWE | 0.0344 | 0.0364 | 0.0342 | 0.0368 | 0.0357 | 0.0371 | 0.0345 | 0.0368 | 0.0338 | 0.0333 | 0.0360 | -      | 0.0462 | 0.0518 |
| UNU | 0.0007 | 0.0162 | 0.0109 | 0.0103 | 0.0030 | 0.0037 | 0.0102 | 0.0032 | 0.0003 | 0.0098 | 0.0000 | 0.0327 | -      | 0.0097 |
| WAN | 0.0034 | 0.0171 | 0.0183 | 0.0166 | 0.0029 | 0.0046 | 0.0193 | 0.0042 | 0.0039 | 0.0158 | 0.0045 | 0.0365 | 0.0056 | -      |

671 BEL=Bella Coola; COL=Columbia; COW=Cowlitz; FRA=Fraser; KEM=Kemano; KIN=Kingcome; KLA=Klamath; KLI=Klinaklini; NAS=Nass;  
672 SAN=Sandy; SKE=Skeena; TWE=Twentymile; UNU=Unuk; WAN=Wannock

673 **Table 3.** Analysis of molecular variance (AMOVA) results showing sources of variation within the amplicon  
674 panel baseline, using the filtered baseline (i.e., greater than 35 individuals per collection, grouped by repunit as per  
675 Table 1).  
676

| Source of variation            | Degrees of freedom | Sums of squares | Variance components (sigma) | Percentage of variation |
|--------------------------------|--------------------|-----------------|-----------------------------|-------------------------|
| Between repunit                | 4                  | 2268.21         | 1.0176                      | 2.13                    |
| Between samples within repunit | 9                  | 1162.54         | 0.7301                      | 1.53                    |
| Within samples                 | 1975               | 90809.00        | 45.9792                     | 96.34                   |
| Total                          | 1988               | 94239.74        | 47.7269                     | 100.00                  |

677

678  
679  
680  
681  
682

**Table 4.** Pairwise genetic differentiation between population-year collections using the SNP panel as shown by Weir-Cockerham  $F_{ST}$  95% confidence limits (lower limits in the bottom half, upper limits in the upper half). Shading is used to show increasing values. Only population-year collections with more than 35 individuals are shown. Negative values in the lower limit were replaced by zero and the comparison was considered to not be significantly different.

|              | BEL-<br>1998 | BEL-<br>2017 | BEL-<br>2018 | FRA-<br>2014 | FRA-<br>2018 | FRA-<br>2019 | KIN-<br>2002 | KIN-<br>2012 | KLA-<br>2013 | KLA-<br>2014 | SKE-<br>2001 | SKE-<br>2010 | SKE-<br>2013 |
|--------------|--------------|--------------|--------------|--------------|--------------|--------------|--------------|--------------|--------------|--------------|--------------|--------------|--------------|
| BEL-<br>1998 | -            | 0.0031       | 0.0041       | 0.0227       | 0.0172       | 0.0186       | 0.0052       | 0.0061       | 0.0205       | 0.0219       | 0.0028       | 0.0061       | 0.0065       |
| BEL-<br>2017 | 0            | -            | 0.0053       | 0.0276       | 0.0208       | 0.0218       | 0.0071       | 0.0087       | 0.0241       | 0.0272       | 0.0024       | 0.0070       | 0.0060       |
| BEL-<br>2018 | 0.0009       | 0.0011       | -            | 0.0250       | 0.0222       | 0.0216       | 0.0076       | 0.0070       | 0.0235       | 0.0264       | 0.0039       | 0.0073       | 0.0068       |
| FRA-<br>2014 | 0.0129       | 0.0160       | 0.0145       | -            | 0.0106       | 0.0099       | 0.0226       | 0.0258       | 0.0145       | 0.0135       | 0.0227       | 0.0272       | 0.0313       |
| FRA-<br>2018 | 0.0096       | 0.0112       | 0.0135       | 0.0052       | -            | 0.0066       | 0.0135       | 0.0181       | 0.0031       | 0.0035       | 0.0161       | 0.0216       | 0.0213       |
| FRA-<br>2019 | 0.0104       | 0.0121       | 0.0125       | 0.0047       | 0.0032       | -            | 0.0208       | 0.0197       | 0.0092       | 0.0107       | 0.0190       | 0.0248       | 0.0285       |
| KIN-<br>2002 | 0.0017       | 0.0023       | 0.0032       | 0.0134       | 0.0067       | 0.0117       | -            | 0.0056       | 0.0179       | 0.0185       | 0.0048       | 0.0086       | 0.0064       |
| KIN-<br>2012 | 0.0019       | 0.0040       | 0.0031       | 0.0165       | 0.0097       | 0.0114       | 0.0012       | -            | 0.0240       | 0.0241       | 0.0076       | 0.0121       | 0.0099       |
| KLA-<br>2013 | 0.0117       | 0.0131       | 0.0141       | 0.0068       | 0.0002       | 0.0038       | 0.0092       | 0.0131       | -            | 0.0024       | 0.0181       | 0.0217       | 0.0231       |
| KLA-<br>2014 | 0.0120       | 0.0146       | 0.0147       | 0.0068       | 0.0005       | 0.0046       | 0.0093       | 0.0139       | 0            | -            | 0.0205       | 0.0245       | 0.0262       |
| SKE-<br>2001 | 0            | 0            | 0            | 0.0116       | 0.0064       | 0.0093       | 0            | 0.0019       | 0.0076       | 0.0087       | -            | 0.0028       | 0.0042       |
| SKE-<br>2010 | 0.0019       | 0.0010       | 0.0032       | 0.0157       | 0.0120       | 0.0130       | 0.0037       | 0.0063       | 0.0112       | 0.0128       | 0            | -            | 0.0036       |
| SKE-<br>2013 | 0.0022       | 0.0014       | 0.0022       | 0.0189       | 0.0115       | 0.0153       | 0.0025       | 0.0047       | 0.0122       | 0.0138       | 0            | 0.0011       | -            |

683  
684

BEL=Bella Coola; COL=Columbia; COW=Cowlitz; FRA=Fraser; KEM=Kemano; KIN=Kingcome; KLA=Klamath; KLI=Klinaklini; NAS=Nass; SAN=Sandy; SKE=Skeena; TWE=Twentymile; UNU=Unuk; WAN=Wannock

685

## FIGURES

686 (A)

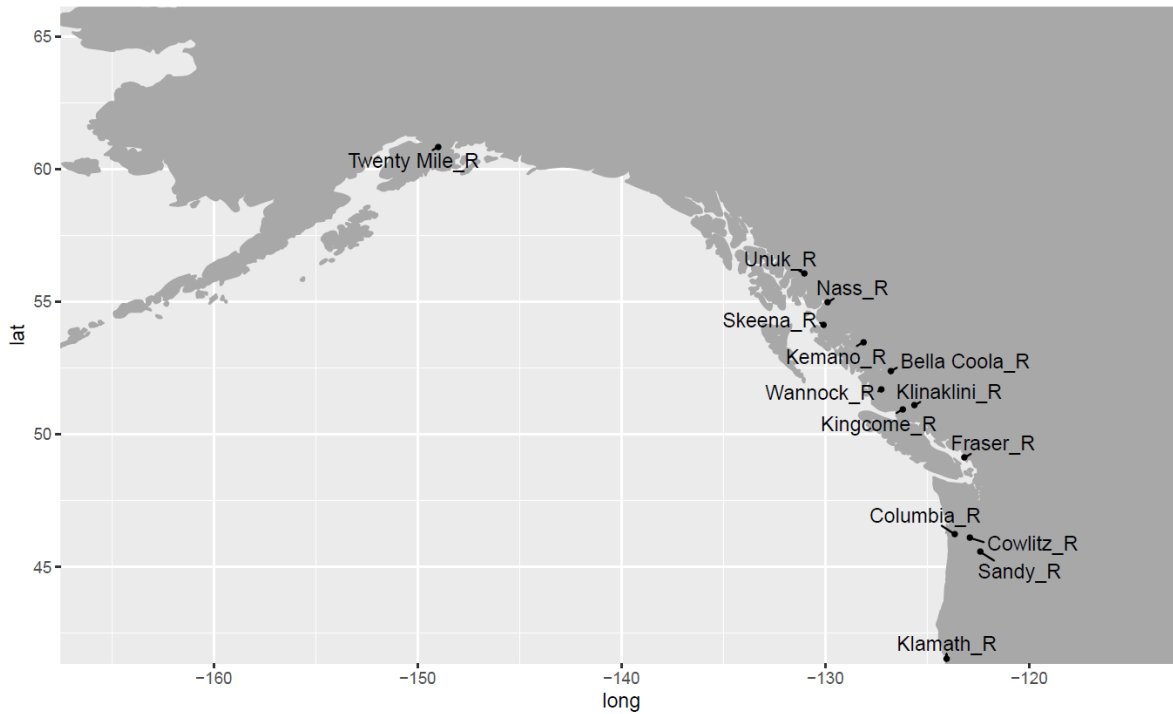

687

688 (B)

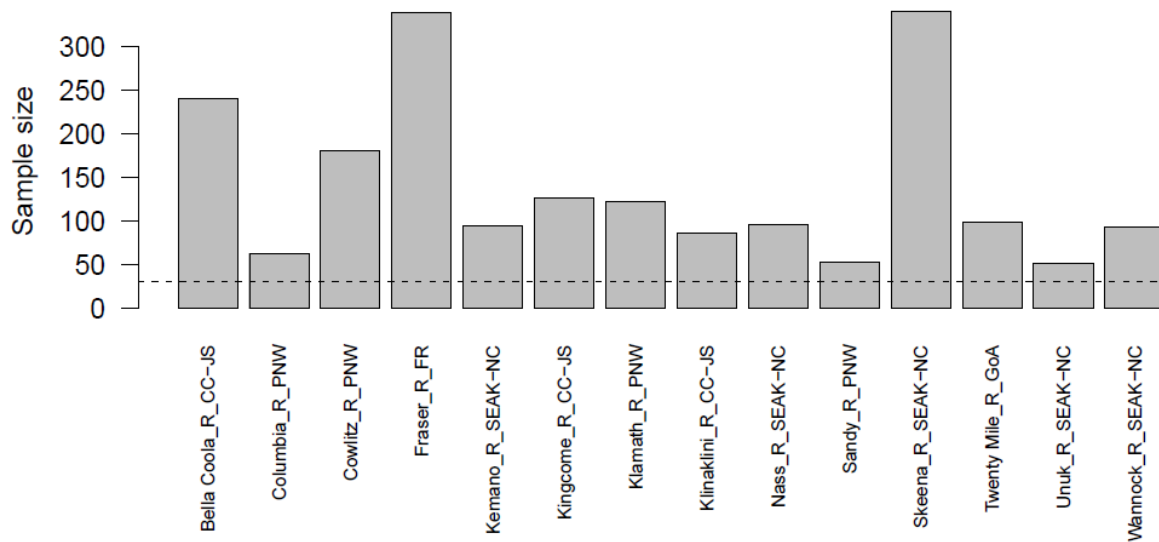

689

690

691 **Figure 1.** Locations (A) and sample sizes (B) for all collections with more than 35 individuals per collection  
692 included in the filtered amplicon baseline.



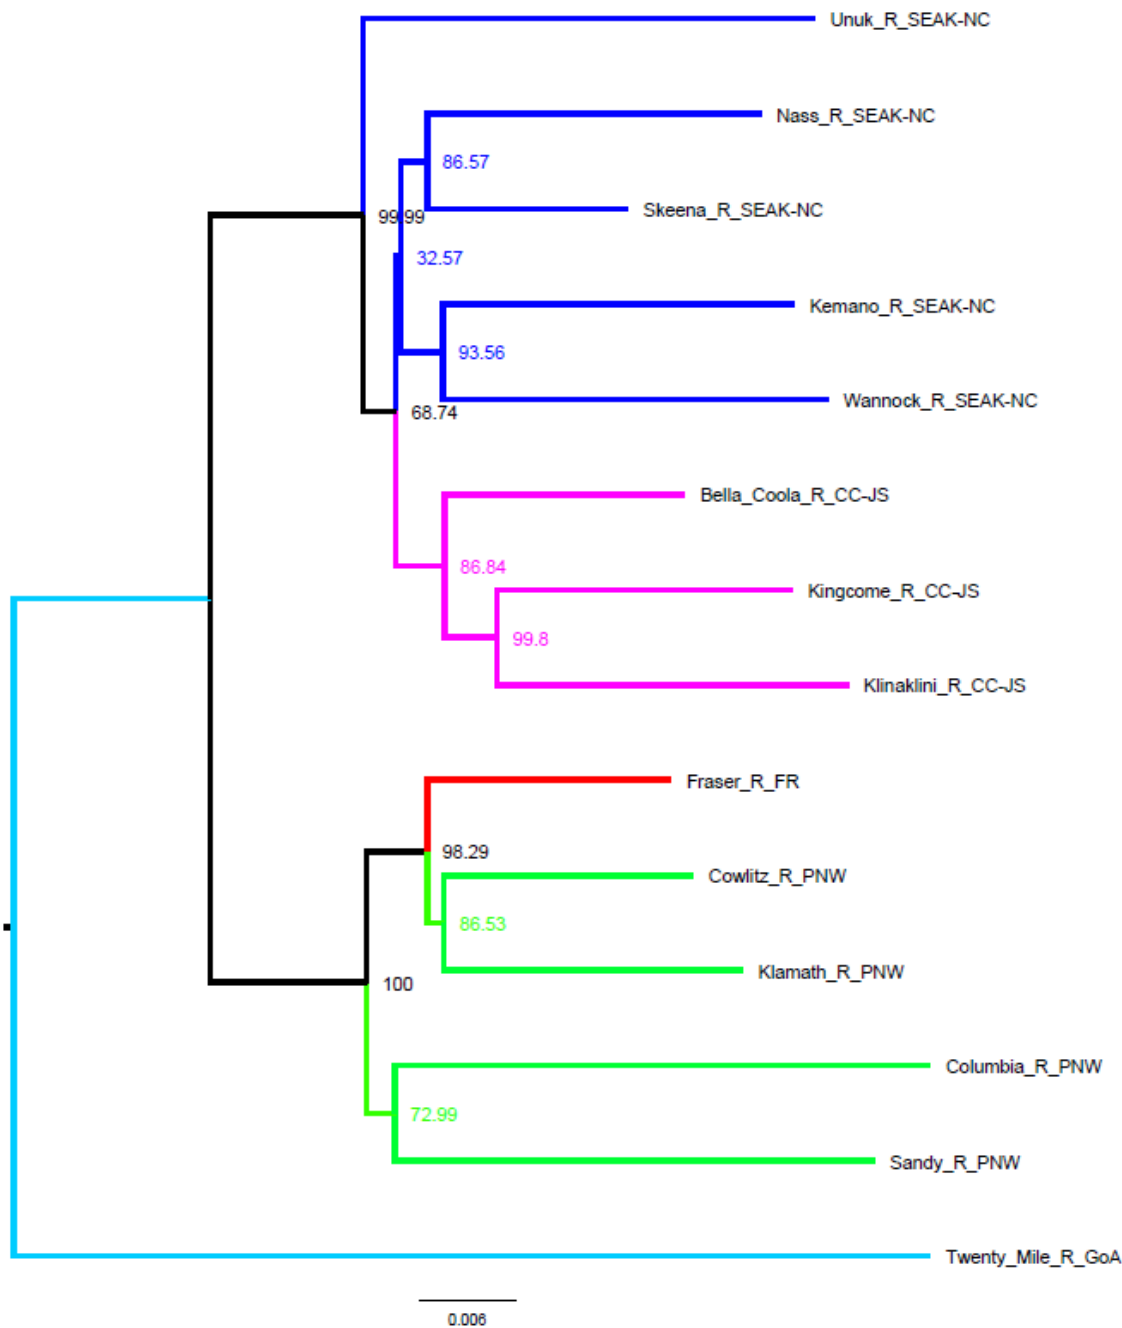

693

694 **Figure 2.** Genetic similarity among populations in the filtered amplicon baseline as shown within a neighbour-  
695 joining tree (Cavalli-Sforza and Edwards chord distance) rooted with Twentymile River. Branches are coloured by  
696 general grouping as shown in Table 1 (light blue = Gulf of Alaska; dark blue = Southeast Alaska, North Coast,  
697 and Central Coast; pink = additional Central Coast and Johnstone Strait populations; red = Fraser River; green =  
698 US southern populations).  
699

700

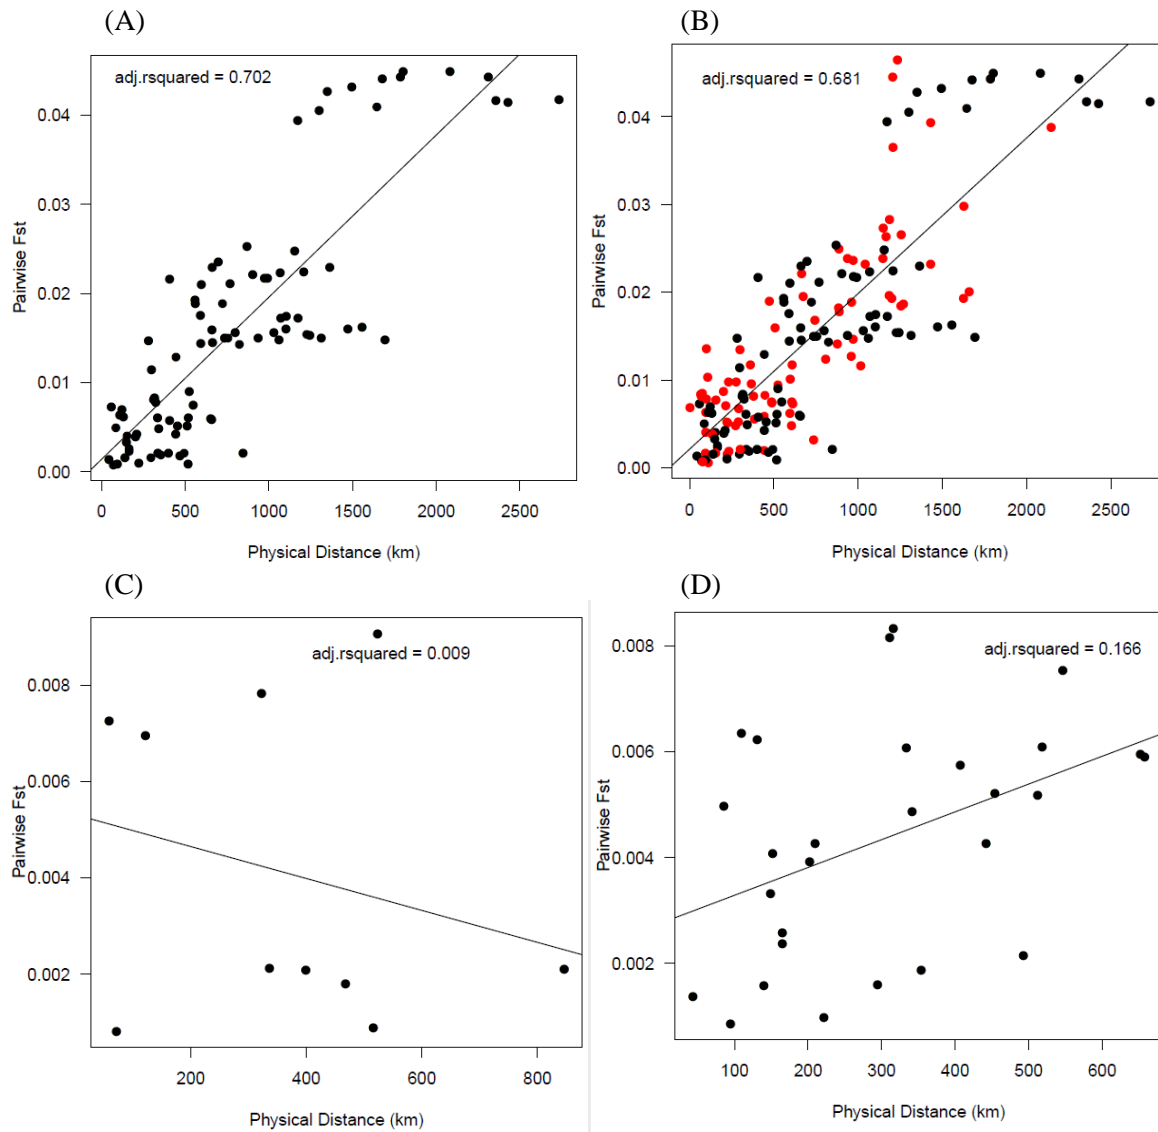

701  
702

703  
704

705 **Figure 3.** Comparison of physical distance by genetic distance, where each dot represents a comparison of a pair  
706 of locations. This indicates that while the populations indicate trends towards isolation-by-distance (A), when  
707 looking at only the southern region (C) or the northern region (D) alone, there is no evidence for within-region  
708 IBD. Therefore the data is better explained by the hierarchical island model. When including the populations with  
709 between 20-35 individuals (B, red dots), the adjusted r-squared value is slightly lower.
